# Supplementary material
Source: MDPI journal article supplement (https://www.mdpi.com/2297-8739/9/9/262)
Supplement: s1 [file s1]

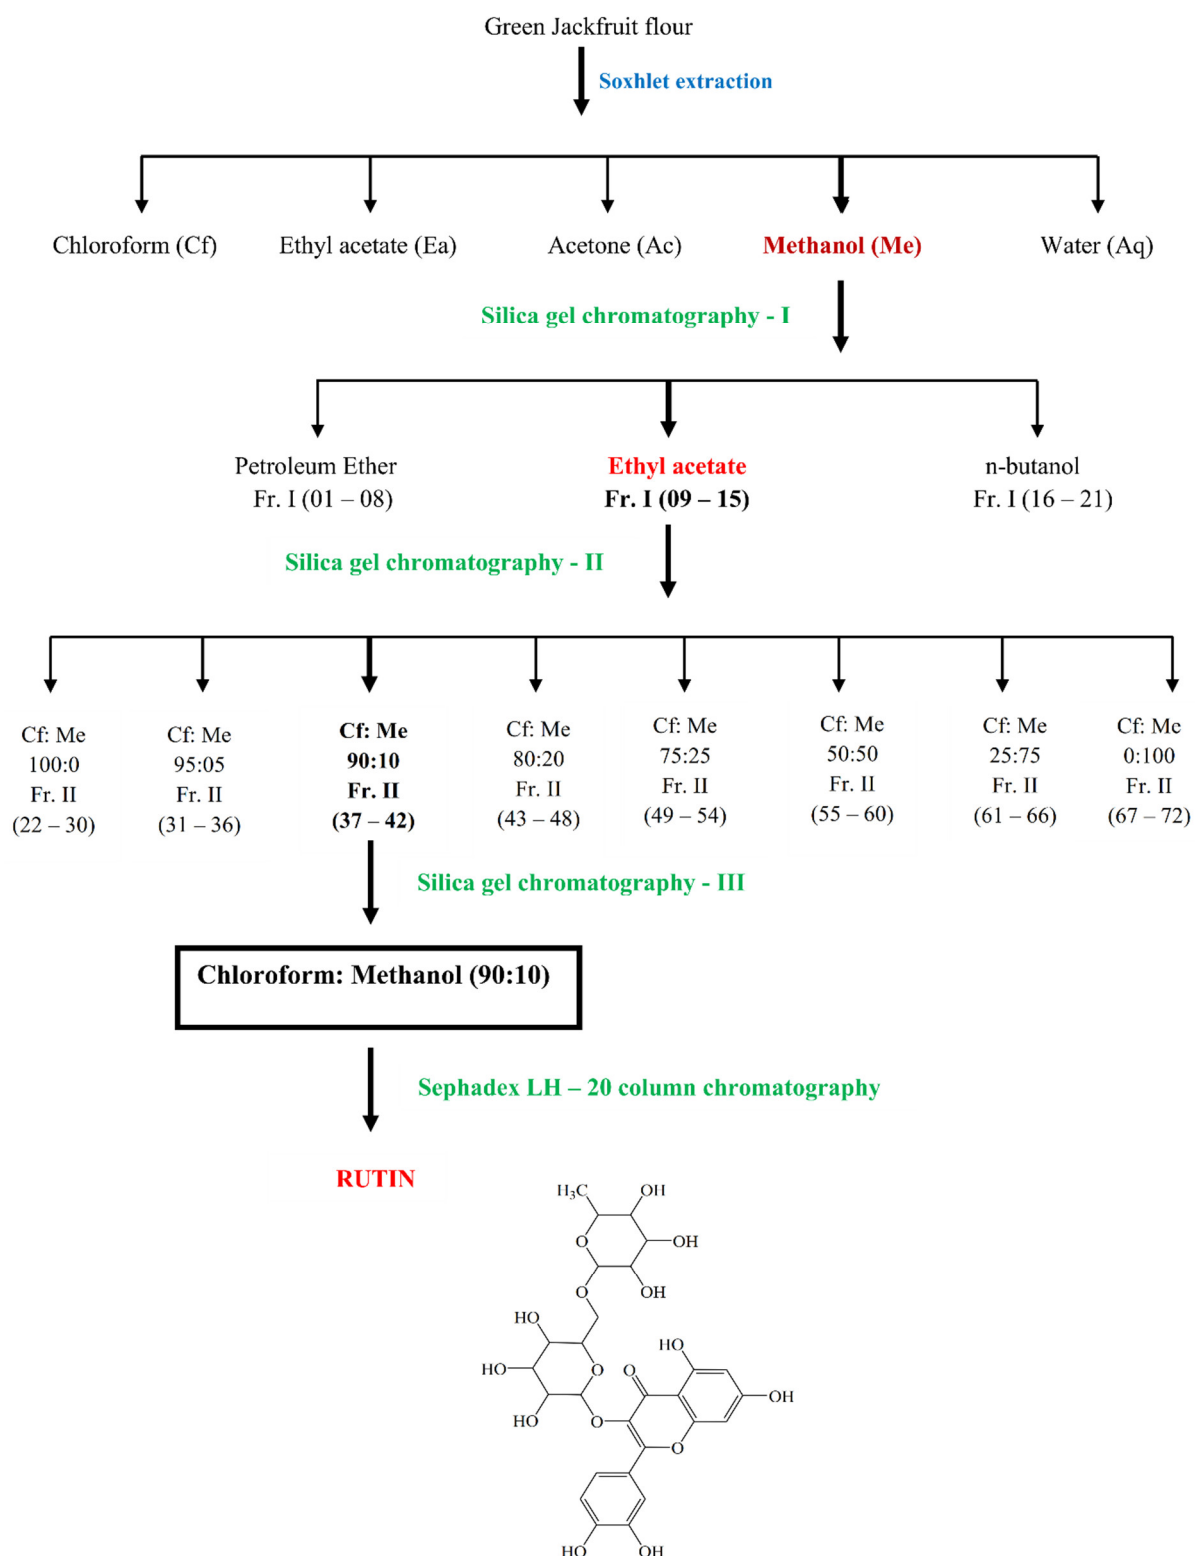

**Figure S1.** Purification outline of rutin from methanol extract of whole jackfruit flour and its structure.

mV

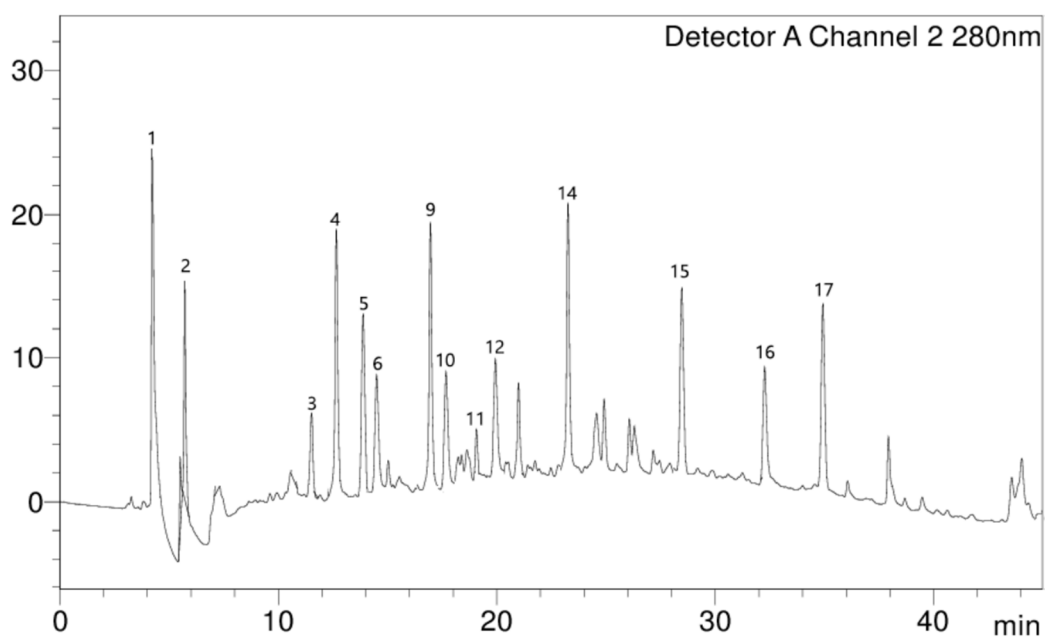

**A**

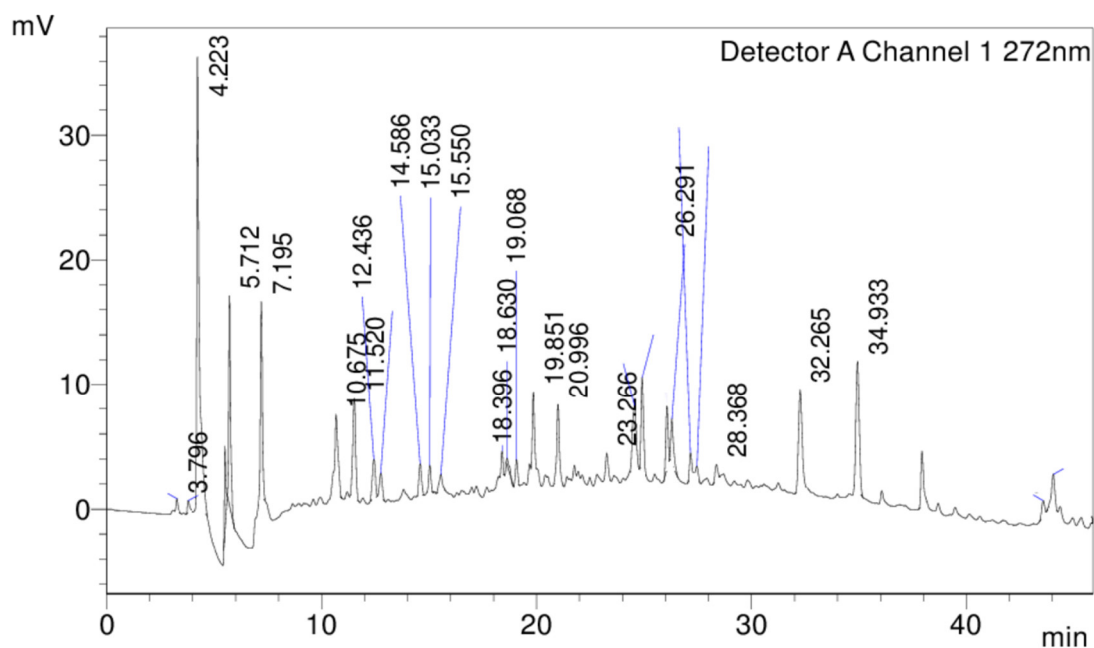

**B**

**Figure S2.** HPLC Chromatogram of standard phenolic compounds *viz.*, (1) Ascorbic acid, (2) Gallic acid, (3) Catechin, (4) Methyl gallate, (5) Caffeic acid, (6) Syringic acid, (9) Rutin, (10) p-Coumaric acid, (11) Sinapic acid, (12) Ferrulic acid, (14) Myrecetin, (15) Quercetin, (16) Apigenin, and (17) Kaempferol (A). HPLC Chromatogram of methanol extract of whole jackfruit flour (B).

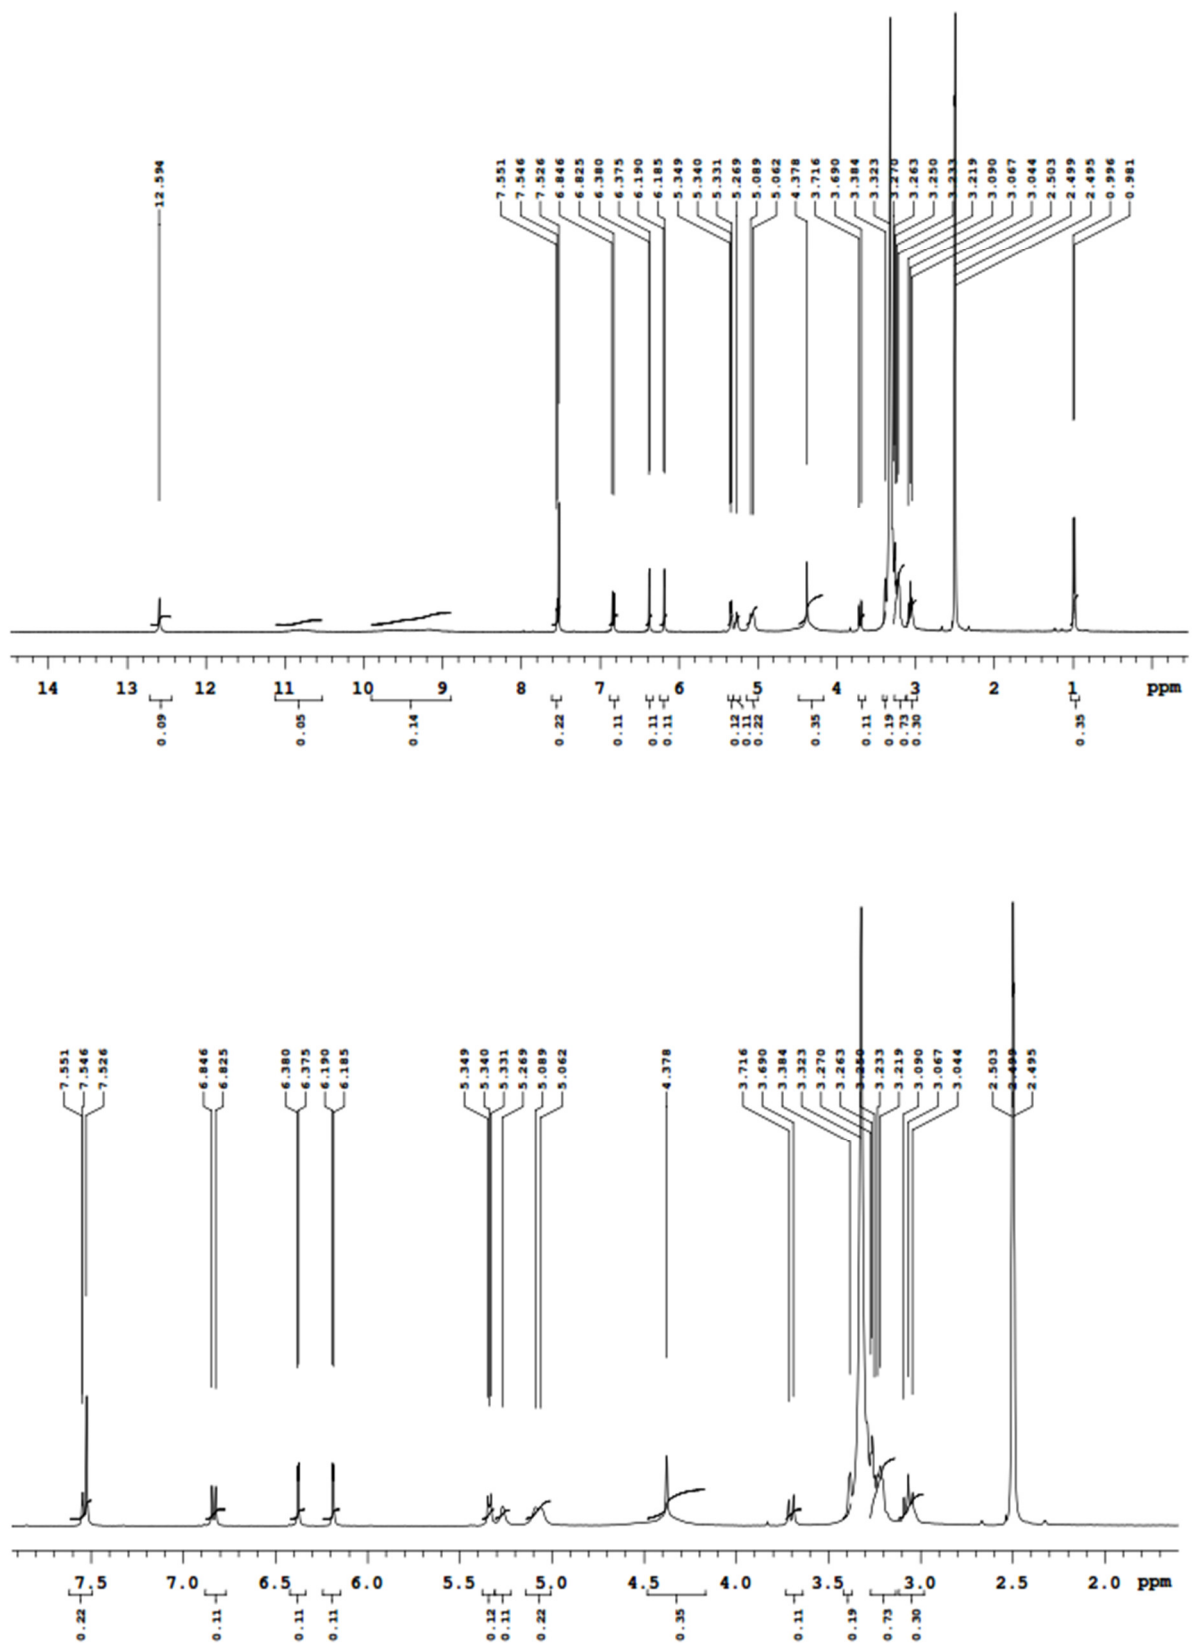

Figure S3. NMR Assignments of Rutin.

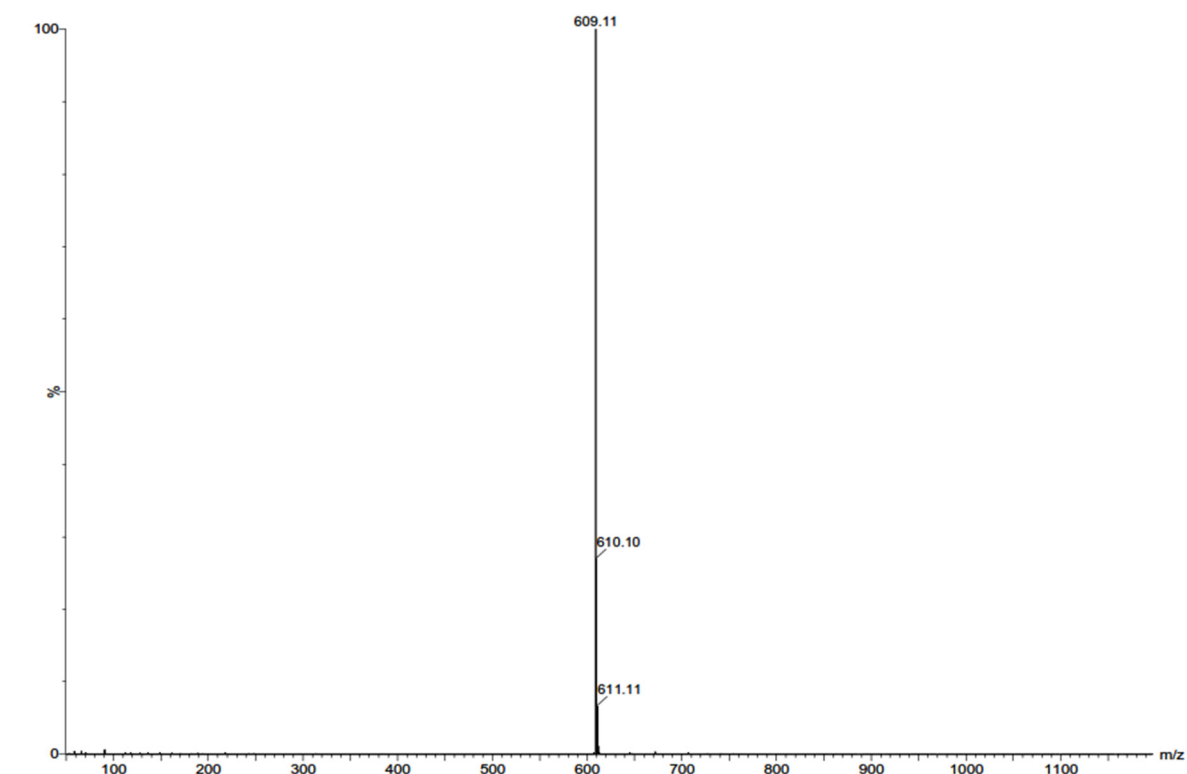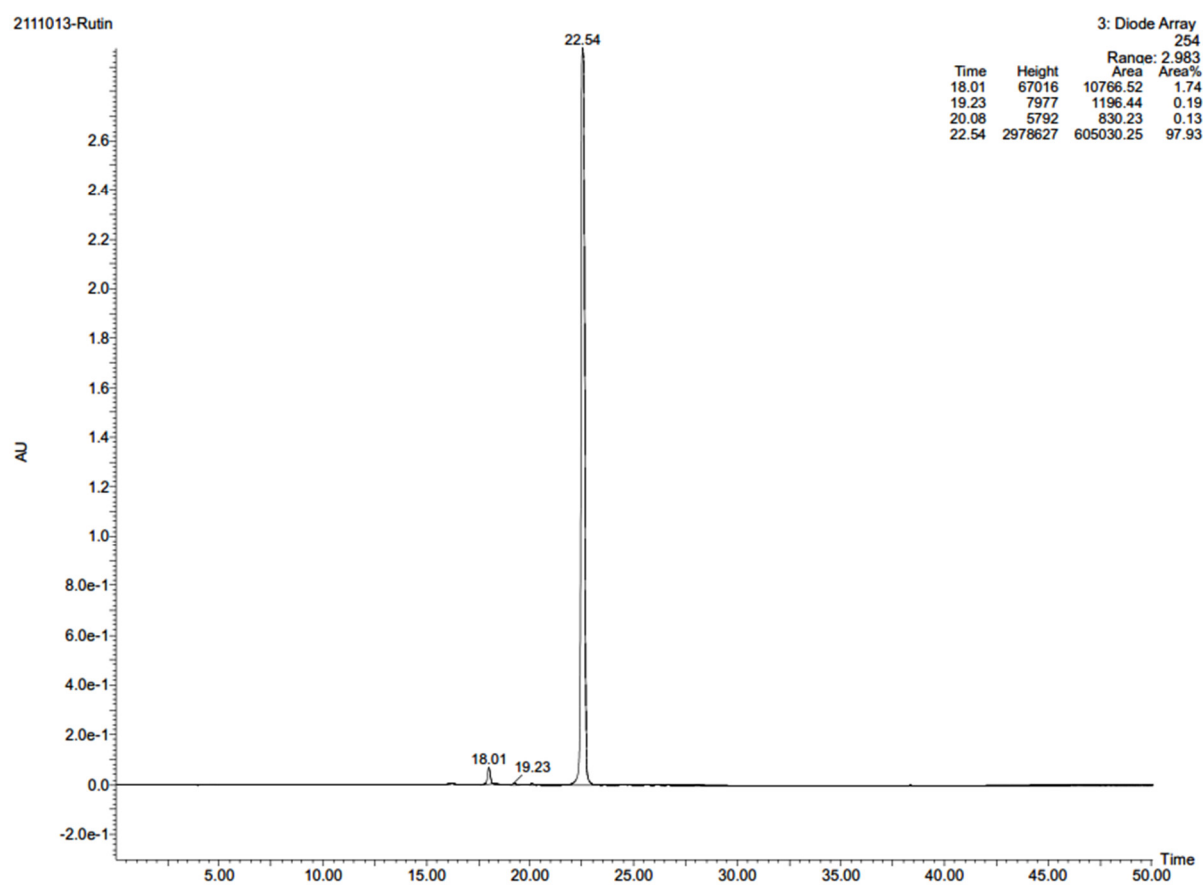

Figure S4. LC-MS Chromatogram of Rutin.
